# Supplementary material for: Synthesis of a tailored SrTiO3–TiO2microspherical photocatalyst and its photogenerated charge properties
Source: Royal Society of Chemistry journal article supplement (doi:10.1039/c3ra46101g), 2013-12-02
Supplement: c3ra46101g.pdf [file c3ra46101g.pdf]

## Supporting Information

# Synthesis of tailored SrTiO<sub>3</sub>-TiO<sub>2</sub> microspherical photocatalyst and its photogenerated charges properties

Yu Zhang, Shen Lin, Wei Zhang, Hao Ge, Gen Li, Yu Zhang, Fu-Yuan Qi and  
Xi-Ming Song\*

Liaoning Key Laboratory for Green Synthesis and Preparative Chemistry of Advanced Materials,  
College of Chemistry, Liaoning University, Shenyang 110036, China.

E-mail: [songlab@lnu.edu.cn](mailto:songlab@lnu.edu.cn) Tel: +86-24-62207794.

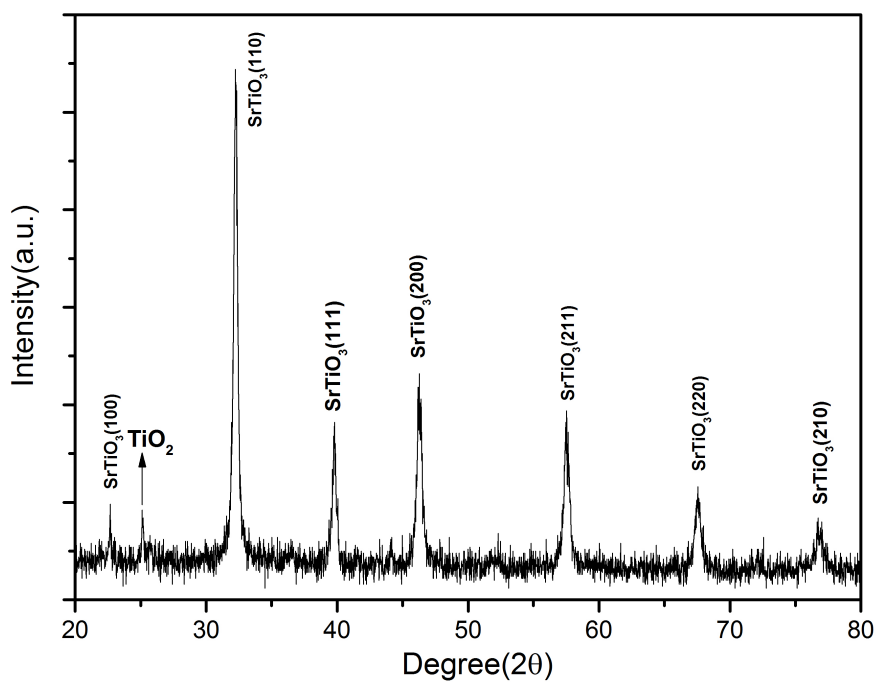

Fig. S1 XRD patterns of SrTiO<sub>3</sub>-TiO<sub>2</sub> nanowires.

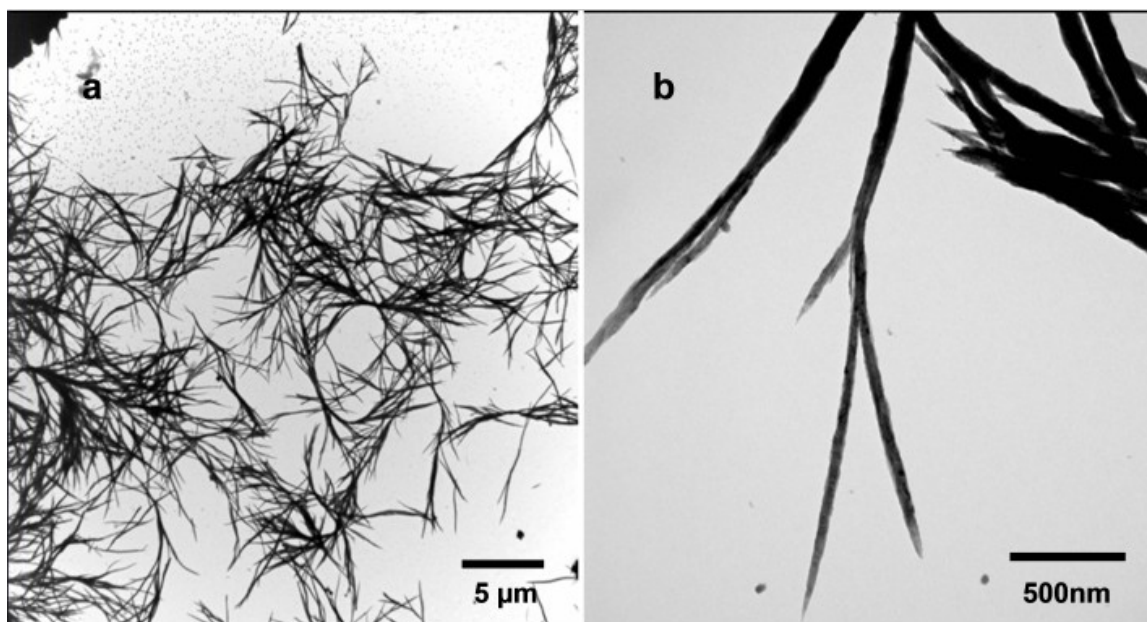

**Fig. S2** The TEM images of SrTiO<sub>3</sub>-TiO<sub>2</sub> nanoliner(a), image(b) is the local amplification image of (a).

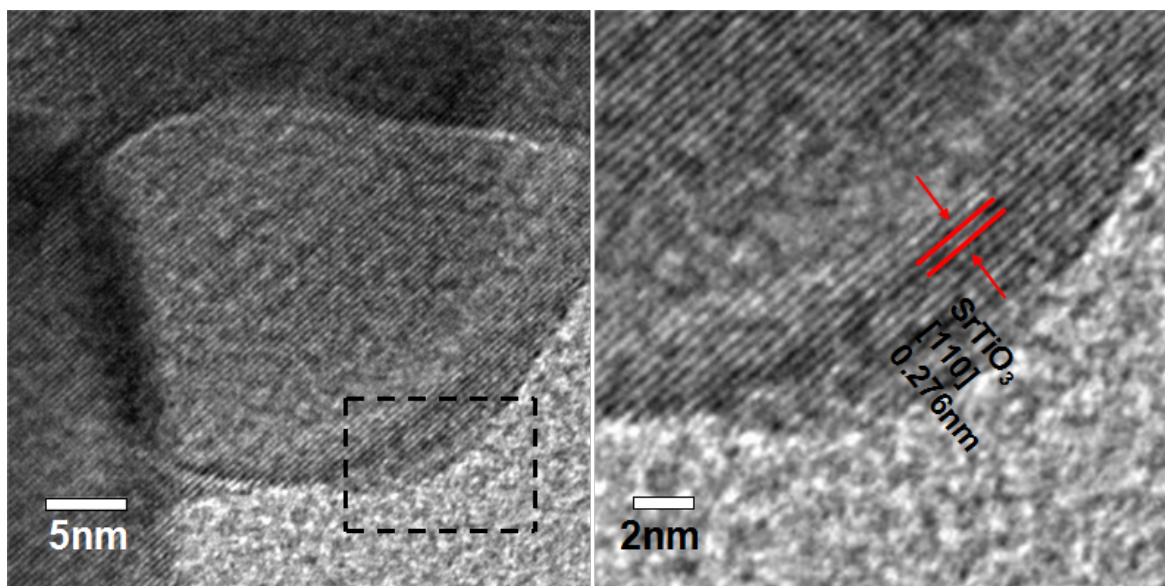

**Fig. S3** HRTEM of the crystalline SrTiO<sub>3</sub> on the microsphere surface.

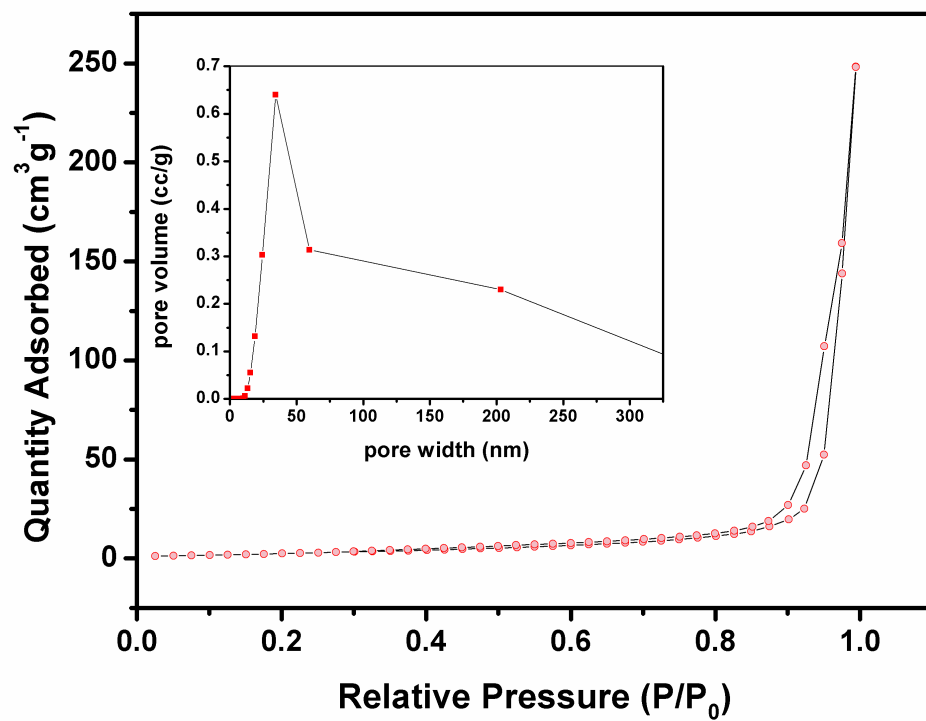

**Fig. S4** Nitrogen adsorption–desorption isotherms and pore-size distribution (inset) of the SrTiO<sub>3</sub>-TiO<sub>2</sub> microspheres with 12 h hydrothermal reaction
